# Supplementary material for: Butein Inhibits Angiogenesis of Human Endothelial Progenitor Cells via the Translation Dependent Signaling Pathway
Source: Hindawi journal article supplement (doi:10.1155/2013/943187), 2013-01-01
Supplement: f1 [file 943187.f1.pdf]

## **Supplementary Methods**

### **Flow cytometry analysis**

After magnetic labeling and separation, isolated CD34-positive progenitor cells were maintained with MV2 complete medium. Human CD34-positive EPCs cells were collected at passage 8 and applied to flow cytometry analysis.  $2 \times 10^5$  cells were incubated with antibodies specific to CD31, CD34 (both from BD Pharmingen), VEGF receptor-2 (KDR; R&D Systems), and *Ulex europaeus* agglutinin-1 lectin (UEA-1; Sigma). Isotype-identical antibodies were used as controls. After 30 minutes of incubation under 4°C in dark, cells were washed twice and resuspended in HBSS buffer immediately followed by analysis using FACScan flow cytometer (BD Biosciences).

### **HUVECs culture**

Human umbilical vein endothelial cells (HUVECs) were purchased from Bioresource Collection and Research Center (Hsinchu, Taiwan) and maintained in M199 containing 20% fetal bovine serum (FBS), 30 µg/ml endothelial cell growth supplements (ECGs), 4 mM L-glutamine, 100 U/ml penicillin and 100 µg/ml streptomycin. Cells were incubated at 37 °C in a humidified atmosphere of 5% CO<sub>2</sub>. Then, HUVECs were used for tube formation and migration assay, respectively.

## Supplementary Figures

### Supplementary figure 1

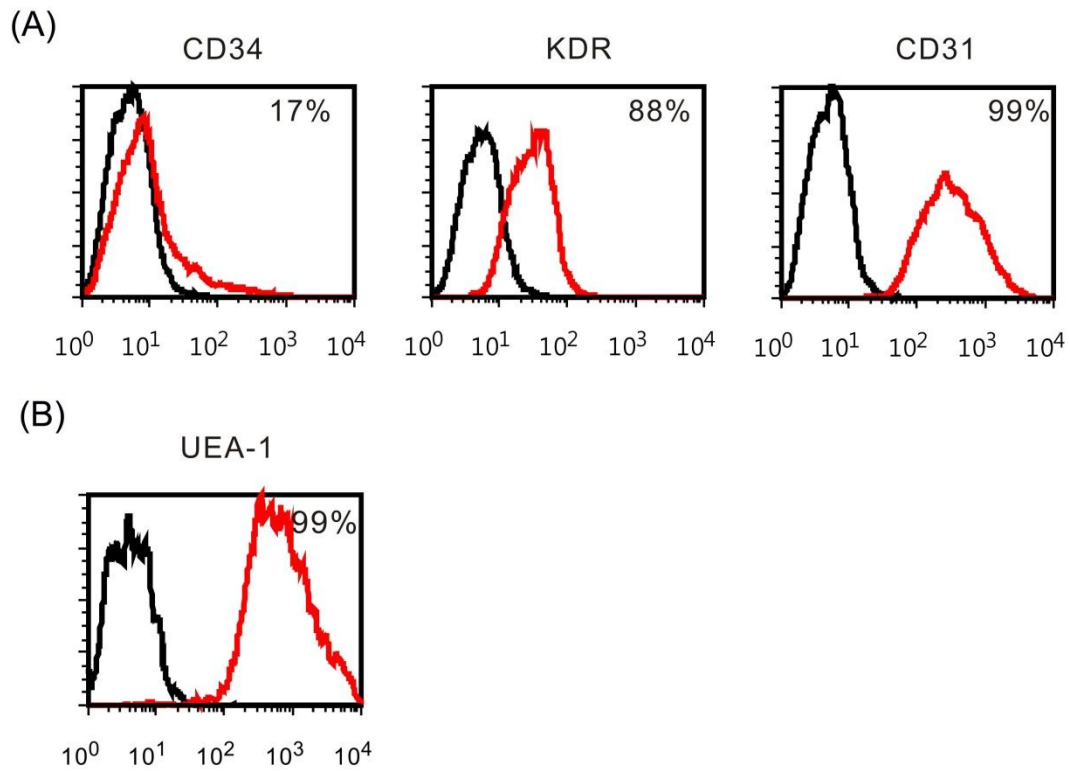

Figure S1. Characterization of human CD34-positive endothelial progenitor cells.

(A) Representative flow cytometry analysis showed that EPCs were positive for CD34, KDR, and CD31. (B) The endothelial cell property was examined by UEA-1 staining. Corresponding negative isotype controls are shown in black.

## Supplementary figure 2

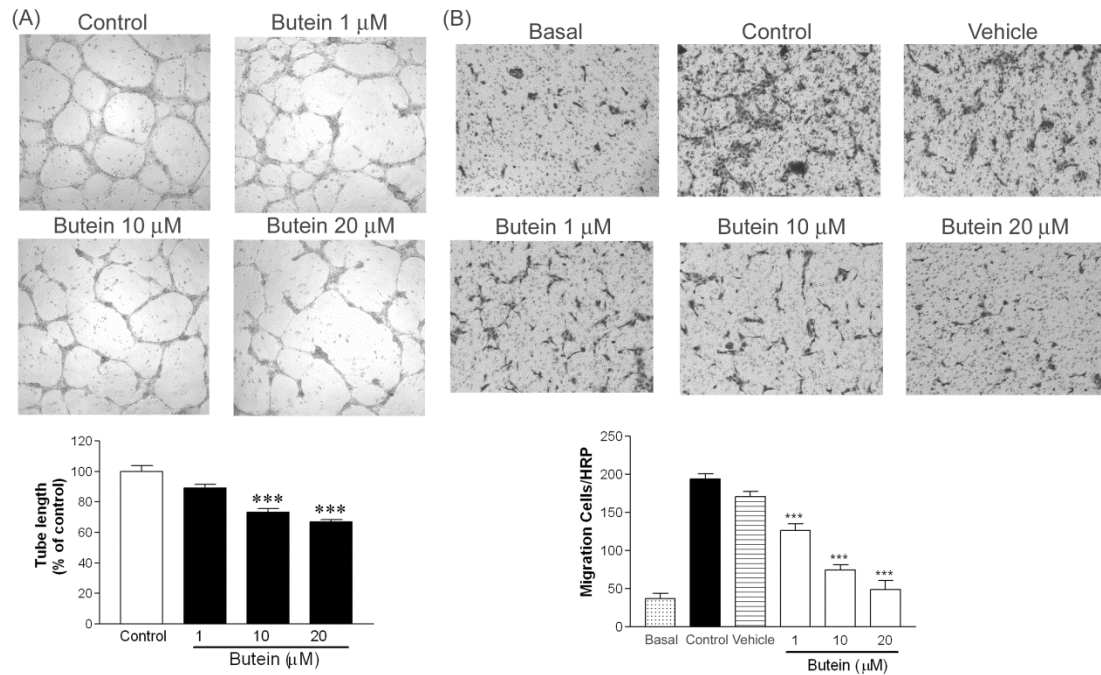

Figure S2. Effects of Butein on tube formation and migration of HUVECs. (A) HUVECs ( $1.2 \times 10^5$  cells/well) were treated with the indicated concentration of butein for 16 h in the presence of VEGF (20 ng/ml), and tubular morphogenesis was recorded by microscope. Tube formation was quantified by measuring the length of tubes in three random fields per well with the use of Image-Pro Plus. (B) HUVECs ( $5 \times 10^4$  cells/well) were seeded onto the upper chamber, then treated with the indicated concentrations of butein for 16 h in the presence of VEGF (20 ng/ml) as a chemoattractant in the lower chamber. Cells that migrated to the underside of the filter membrane were stained, photographed, and quantified by microscope. Data are expressed as mean  $\pm$  S.E.M. of three independent experiments. \*\*\* $p < 0.001$  compared with the control group.
